# Supplementary material
Source: publisher figshare collection journal article supplement (https://acs.figshare.com/ndownloader/files/4129099)
Supplement: Supplementary file 1 [file 4129099]

## “Synthesis and Characterization of Novel Polyacid-Stabilized Latexes”

P. C. Yang and S. P. Armes\*

| Entry No. | Target DP | DP ( $^1\text{H}$ NMR) | Conv. % | Reaction time (h) | $M_n$  | $M_w/M_n$ |
|-----------|-----------|------------------------|---------|-------------------|--------|-----------|
| 1         | 30        | 31                     | 100     | 24                | 10,500 | 1.17      |
| 2         | 40        | 41                     | 100     | 24                | 12,300 | 1.17      |
| 3         | 50        | 57                     | 99      | 24                | 15,700 | 1.24      |
| 4         | 60        | 73                     | 99      | 48                | 19,600 | 1.25      |
| 5         | 70        | 82                     | 92      | 72                | 21,200 | 1.31      |

**Table S1.** Mean degrees of polymerization, monomer conversions and GPC molecular weight data for the homopolymerization of 2-hydroxypropyl methacrylate (HPMA) via ATRP in pure IPA at 50 °C (THF GPC calibrated with poly(methyl methacrylate) standards).

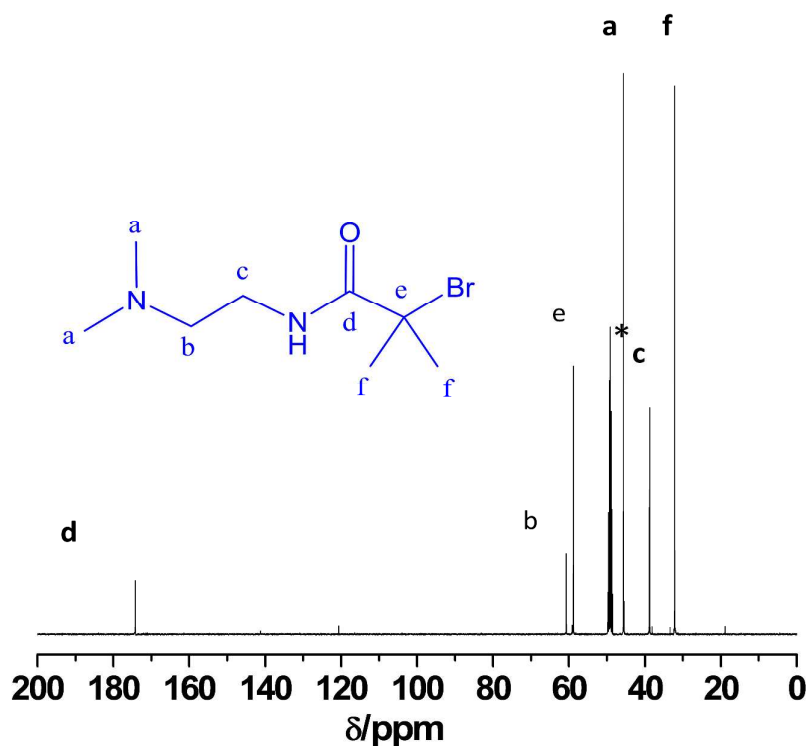

**Figure S1.** Assigned  $^{13}\text{C}$  NMR spectrum recorded in  $d_4$ -methanol for 2-(dimethylamino)ethyl-2-bromoisobutyrylamide ATRP initiator.

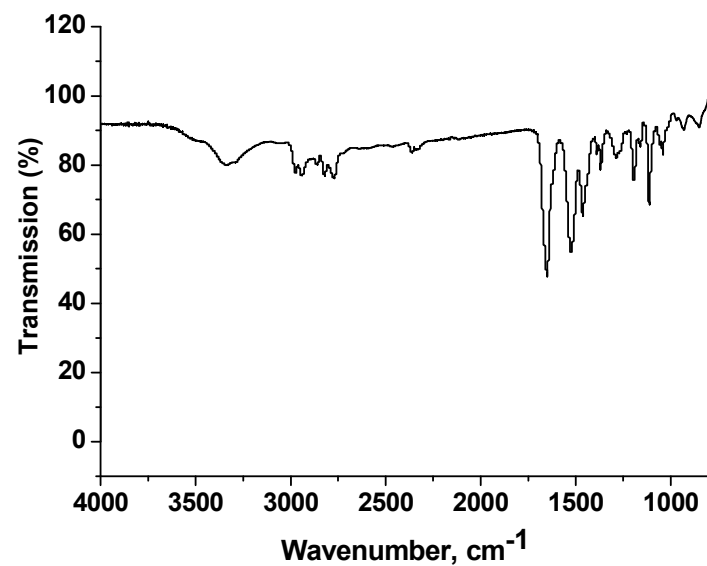

**Figure S2.** FT-IR spectrum recorded for dimethylamino)ethyl-2-bromoisobutyrylamide ATRP initiator.

P. Yang ATRP Initiatin

26armes01 136 (0.804) Cm (135:144)

25-Jun-2012

1: TOF MS ES+  
2.00e5

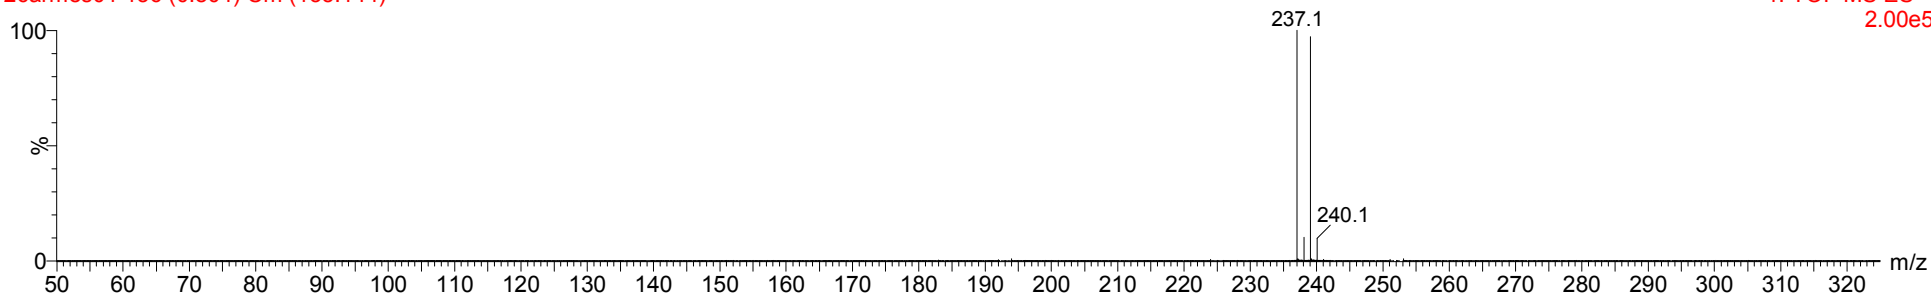

**Figure S3.** Mass spectrum recorded for 2-(dimethylamino)ethyl-2-bromoisobutyrylamide ATRP initiator. ESI-MS,  $m/z$   $(M+H)^+$  237

Accurate mass (calculated),  $(M+H)^+$ : 237.0602 (237.0600) corresponding to an elemental composition of  $C_8H_{18}BrN_2O$  ( $C_8H_{18}BrN_2O$ )

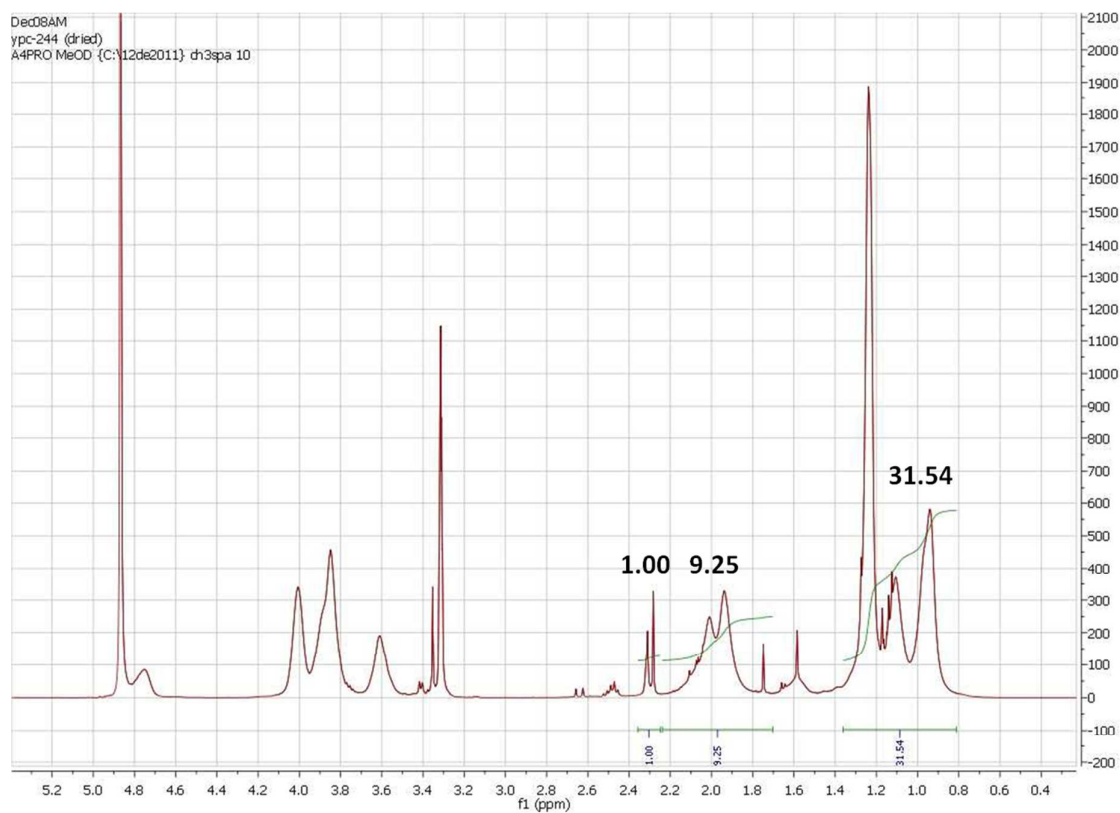

**Figure S4.**  $^1\text{H}$  NMR spectrum recorded in  $\text{d}_4$ -methanol for PHPMA<sub>30</sub> homopolymer precursor.

These peak integrals were used to calculate the mean degree of polymerization.

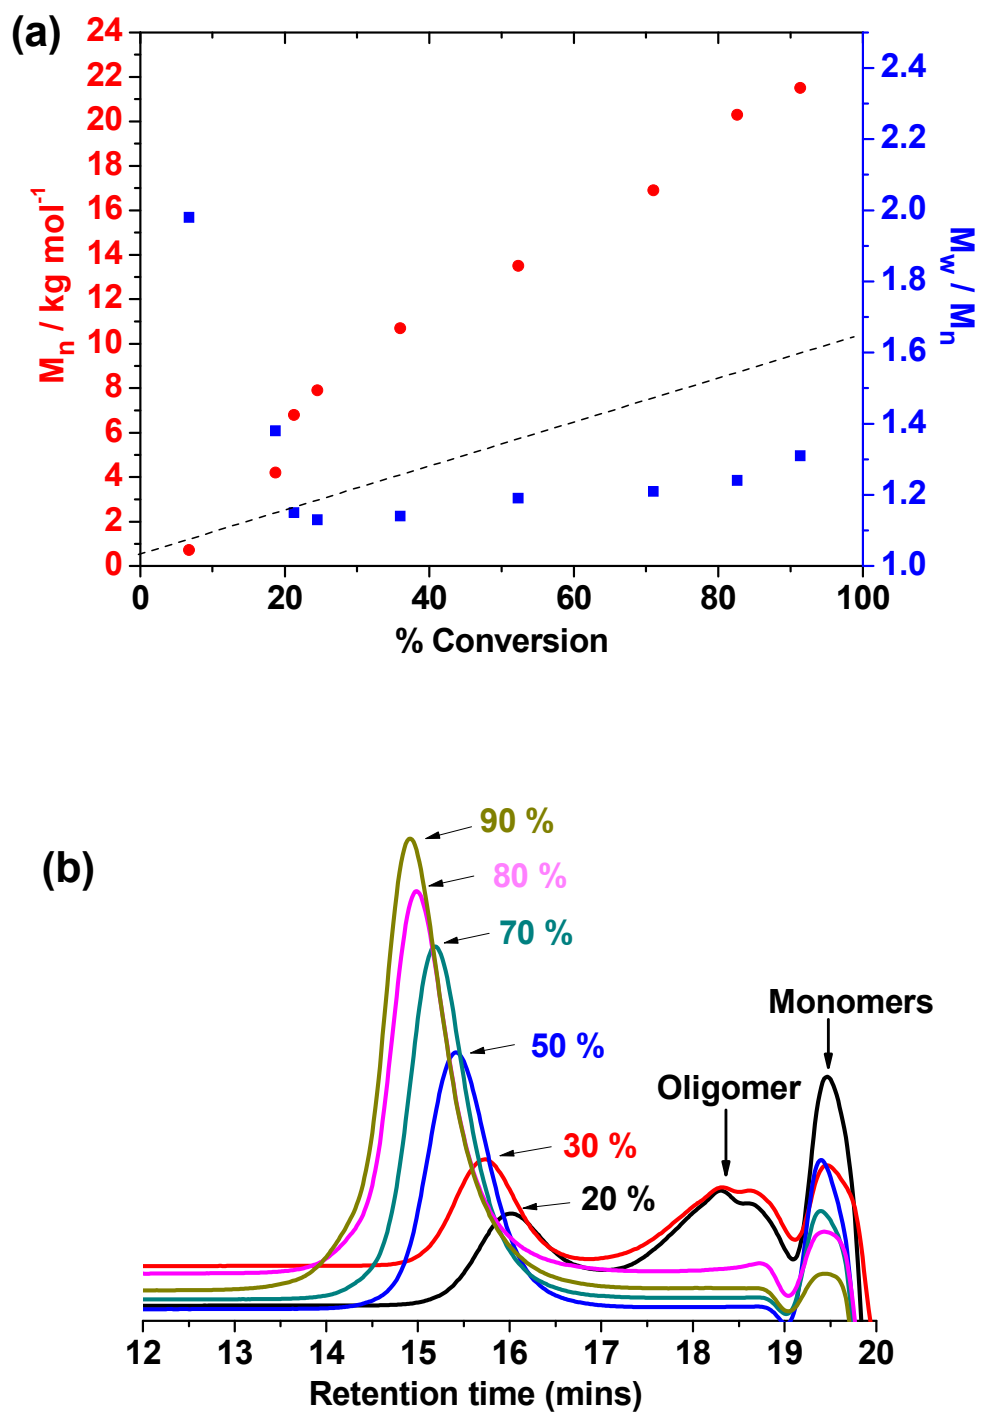

**Figure S5.** (a) Evolution of number-average molecular weight with monomer conversion and (b) THF GPC traces obtained for the ATRP synthesis of PHPMA<sub>70</sub> in pure IPA at 50 °C. Relative molar ratios for initiator: Cu(I)Cl: bpy were 1:1:2. The dotted line represents the theoretical  $M_n$ .

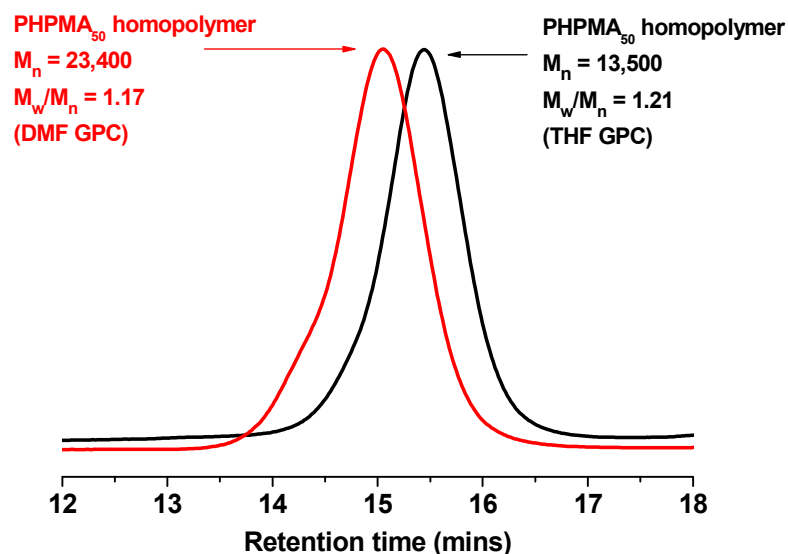

**Figure S6.** THF and DMF GPC traces obtained for PHPMA<sub>50</sub> homopolymer.

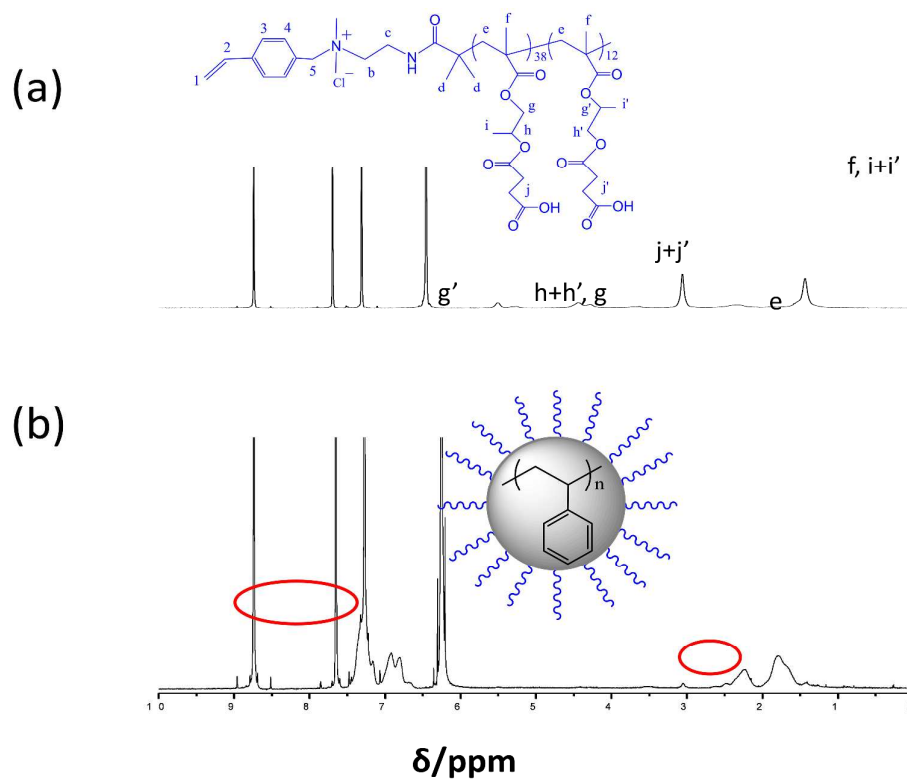

**Figure S7.**  $^1\text{H}$  NMR spectra recorded in  $d_5$ -pyridine for (a) PSPMA<sub>50</sub> macromonomer and (b) a dried PSPMA<sub>50</sub>-PS latex prepared using 10 wt. % PSPMA<sub>50</sub> macromonomer and a cationic AIBA initiator via aqueous emulsion polymerization. (The red circles highlight the integrated signals that were used to determine the PSPMA stabilizer content. The signal at  $\delta$  3.0 is assigned to the four protons adjacent to the pendent carboxylic acid group on the PSPMA macromonomer, and the signals at  $\delta$  6.5-7.5 are assigned to the aromatic protons due to the polystyrene component).

### Example for calculating the stabilizer content of PSPMA-PS latexes

For an  $^1\text{H}$  NMR spectrum recorded for dried PSPMA<sub>50</sub>-PS latex prepared using 10 wt% PSPMA<sub>50</sub> macromonomer and a cationic AIBA initiator (Figure S5), integrated signals at  $\delta$  6.5-7.5 (5H) are compared with signals at  $\delta$  3.0 (4H). This gives a PSPMA<sub>50</sub>/PS **molar ratio (r)** of **30.87**

The molecular weight of styrene  **$M_{sty} = 104.15 \text{ g/mol}$**

The molecular weight of a PSPMA<sub>50</sub> repeat unit  **$M_{PSPMA} = 244 \text{ g/mol}$**

Therefore, the stabilizer content of this PSPMA<sub>50</sub>-PS latex equals

$$\frac{M_{PSPMA}}{M_{sty} \times r} \times 100\% = \frac{244}{104.15 \times 30.87} \times 100\% = 7.60\%$$

### Example for calculating PSPMA stabilizer absorbed amount, $\Gamma$ , in $\text{mg m}^{-2}$

This calculation is based on the assumption that all the PSPMA macromonomer chains are located the polystyrene latex surface. For the PSPMA<sub>50</sub>-PS latex prepared using 10 wt% PSPMA<sub>50</sub> macromonomer and a cationic AIBA initiator (see entry 5, Table 2), the stabilizer content obtained from  $^1\text{H}$  NMR is **7.60 %** (see above sample calculation)

The density of polystyrene latex  **$\rho = 1.05 \text{ g cm}^{-3}$**

The diameter of this latex is estimated from its SEM image (see entry c, Figure 8)  **$d = 60 \text{ nm}$**

Therefore, the specific surface area ( **$A_s$** ) of **1 g** this latex can be calculated

$$A_s = \frac{3}{\rho \left(\frac{d}{2}\right)} = \frac{3}{1.05 \times 10^{-6} \times (60 \times 10^{-9} \div 2)} = 95 \text{ m}^2$$

The value of  $A_s$  is corrected ( **$CA_s$** ) for only a polystyrene core, assuming **1 g** of latex

$$CA_s = (1 - 7.60\%) \times A_s = 88 \text{ m}^2$$

For 1 g of latex there is 0.076 g (1 multiplied by 0.076) of PSPMA stabilizer, therefore  **$\Gamma =$**

$$\frac{0.076 \times 10^3}{CA_s} = \frac{76}{88} = 0.86 \text{ mg m}^{-2}$$
